# Supplementary material for: A clinical-scale BioArtificial Liver, developed for GMP, improved clinical parameters of liver function in porcine liver failure
Source: PubMed Central journal article supplement (PMC5674071; doi:10.1038/s41598-017-15021-4), 2017-11-06
Supplement: 41598_2017_15021_MOESM1_ESM.pdf [file 41598_2017_15021_MOESM1_ESM.pdf]

**Supplementary Info Selden *et al.***

**A clinical-scale BioArtificial Liver developed for GMP improved clinical parameters of liver function in porcine liver failure**

Clare Selden\*<sup>#</sup>, James Bundy<sup>#</sup>, Eloy Erro<sup>#</sup>, Eva Puschmann<sup>#</sup>, Malcolm Miller<sup>+</sup>, Delawir Kahn<sup>+</sup>, Humphrey Hodgson<sup>#</sup>, Barry Fuller<sup>^</sup>, Jordi Gonzalez-Molina<sup>#</sup>, Aurelie Le Lay<sup>#</sup>, Stephanie Gibbons<sup>#</sup>, Sherri Chalmers<sup>#</sup>, Sunil Modi<sup>#</sup>, Amy Thomas<sup>#</sup>, Peter Kilbride, Agnes Isaacs<sup>+</sup>, Richard Ginsburg<sup>+</sup>, Helen Ilsley<sup>+</sup>, David Thomson<sup>+</sup>, Galya Chinnery<sup>+</sup>, Ncedile Mankahla<sup>+</sup>, Lizel Loo<sup>+</sup>, C.Wendy Spearman<sup>+</sup>.

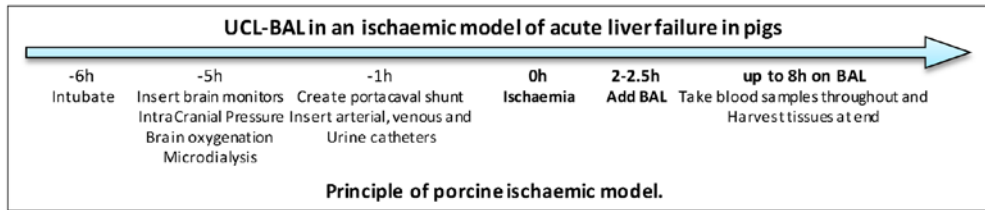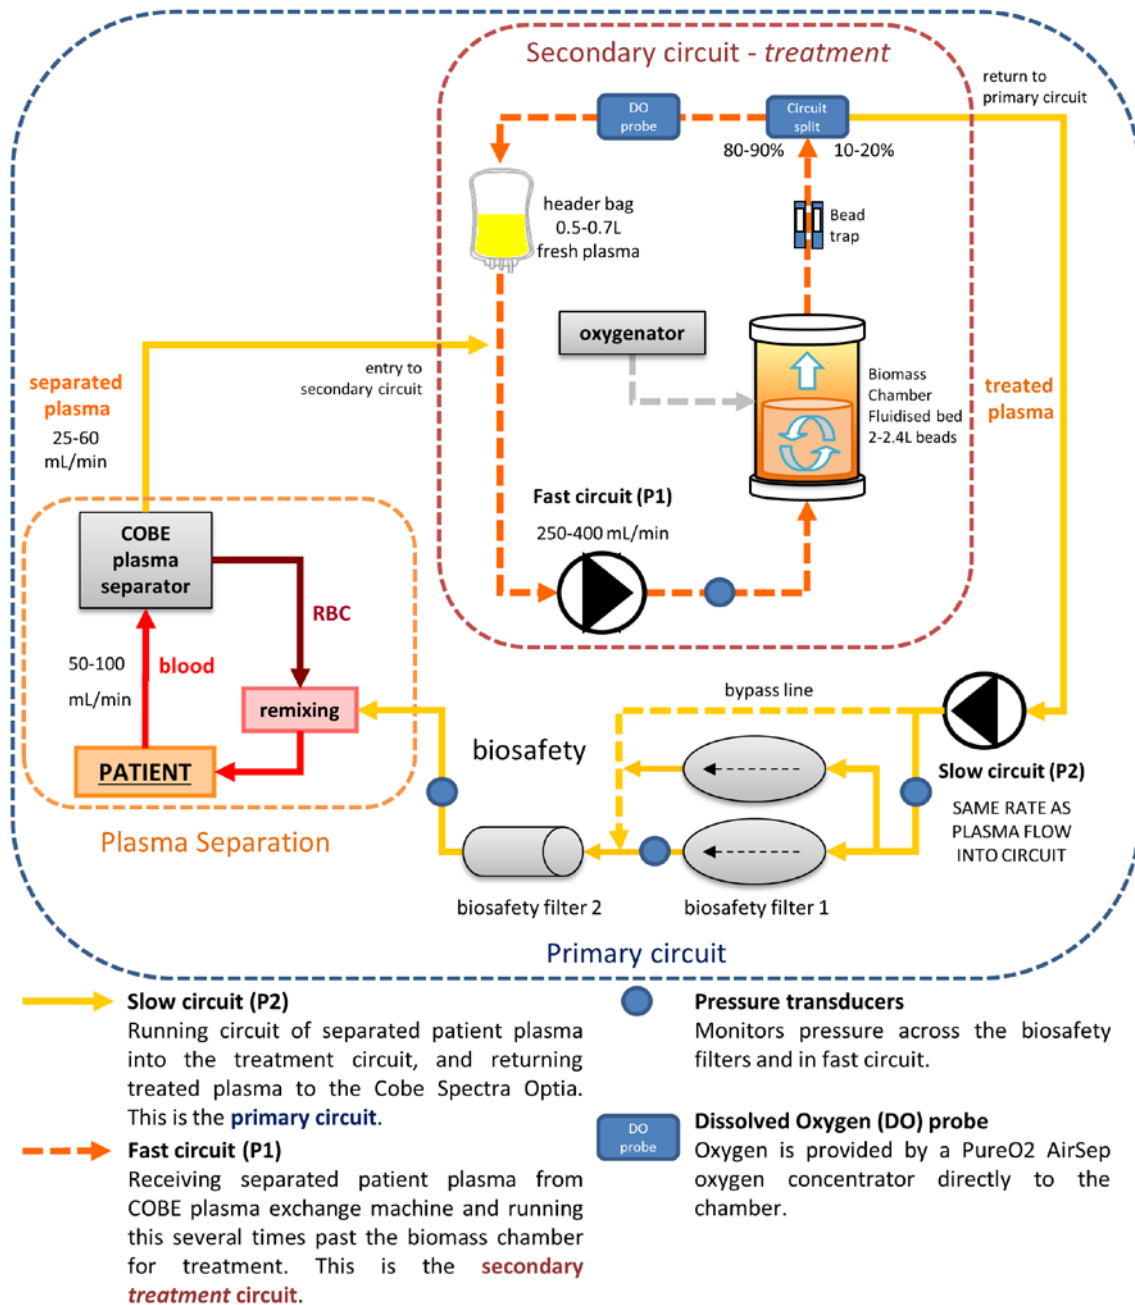

**Figure 1 (Supplementary):** Time course of pig liver failure model used for BioArtificial liver testing, and detailed circuit diagram for patient system.

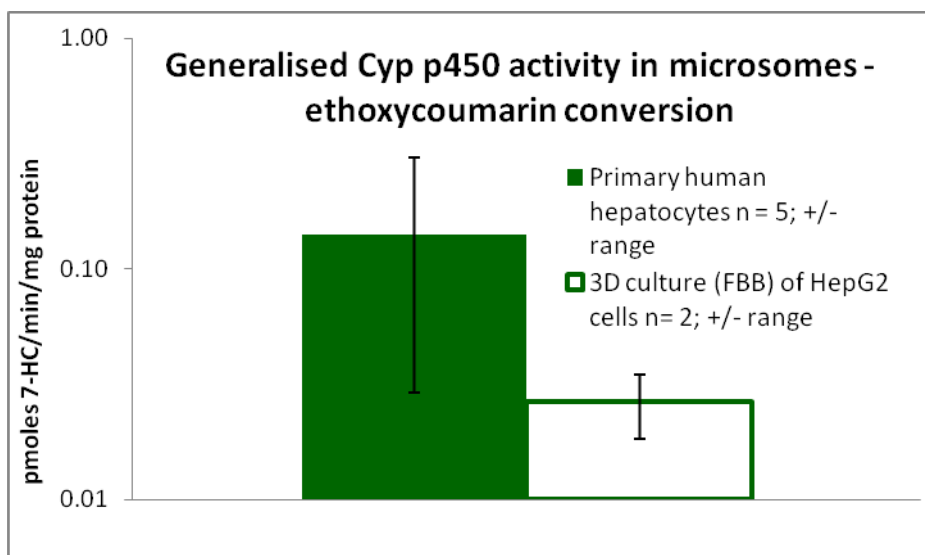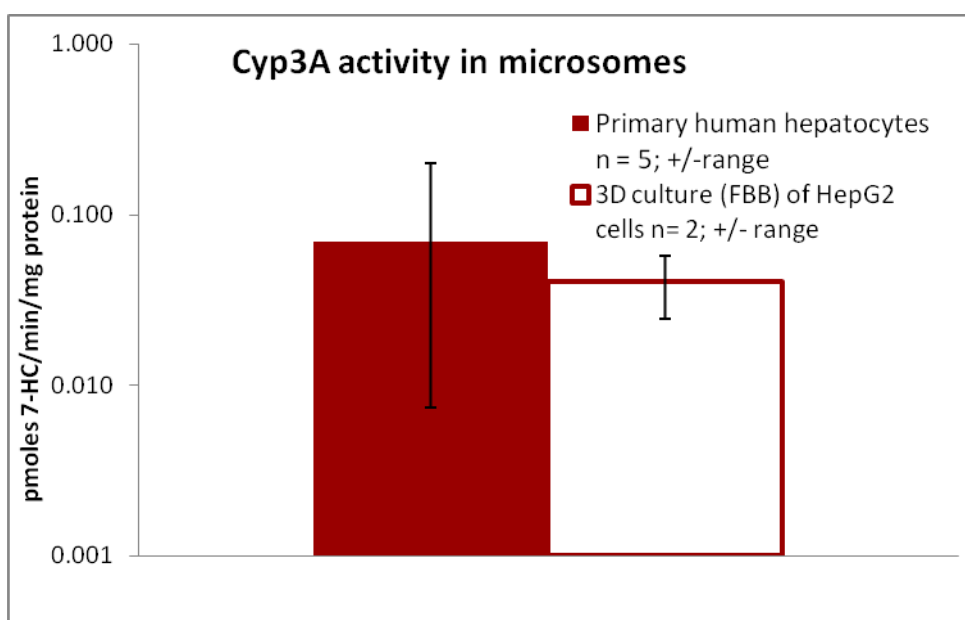

**Figure 2 (supplementary). Cytochrome P450 activity in FBB biomass compared with hepatocytes from patients.** (a) ethoxycoumarin conversion in primary human hepatocytes and FBB biomass. 7-ethoxycoumarin (7-EC, 200 $\mu$ m) was used as a substrate; 7-ethoxycoumarin-O-deethylation (ECOD) results in 7-hydroxycoumarin product formation by incubation for 1h at 37C and extraction of product. Fluorescence was determined in a Cytofluor microplate reader at excitation 364/40 and emission 460/40. Results were normalised to protein estimated by the BCA assay: this reaction may be catalysed by cytochrome P450 enzymes from CYP1, CYP2 and CYP3 families. (b) Specific activities of Cytochrome P4503A in microsomes isolated from primary human hepatocytes compared with FBB biomass culture. A Promega P450 GLO assay was used to determine isoform specific P450 3A

|                        | control-BAL         | cell-BAL             |
|------------------------|---------------------|----------------------|
| ALK. PHOSPHATASE       | 340.0 ± 31.07 N=15  | 310.9 ± 33.06 N=13   |
| AMMONIA PLASMA         | 348.5 ± 24.81 N=15  | 346.2 ± 37.99 N=13   |
| ANION GAP              | 12.73 ± 1.217 N=15  | 13.31 ± 1.707 N=13   |
| AST*                   | 150.2 ± 26.04 N=16  | 311.4 ± 46.69 N=13   |
| BICARBONATE            | 23.48 ± 1.441 N=15  | 24.15 ± 1.229 N=13   |
| BILIRUBIN CONJUGATED   | 3.813 ± 0.3058 N=16 | 4.154 ± 0.4783 N=13  |
| BILIRUBIN UNCONJUGATED | 5.063 ± 0.5513 N=16 | 5.615 ± 0.6154 N=13  |
| BILIRUBIN TOTAL        | 8.875 ± 0.7631 N=16 | 9.769 ± 0.9946 N=13  |
| CREATININE             | 108.6 ± 4.387 N=16  | 100.1 ± 5.579 N=13   |
| FIBRINOGEN             | 1.264 ± 0.1003 N=14 | 1.592 ± 0.2138 N=13  |
| GLUCOSE                | 4.507 ± 1.135 N=14  | 4.391 ± 0.7204 N=11  |
| HAEMOGLOBIN            | 11.31 ± 0.6563 N=15 | 11.73 ± 0.2986 N=13  |
| INR                    | 1.700 ± 0.5553 N=16 | 1.169 ± 0.04583 N=13 |
| LACTATE                | 8.725 ± 1.051 N=16  | 8.023 ± 1.169 N=13   |
| PATIENT PTT            | 95.68 ± 13.61 N=15  | 80.23 ± 12.47 N=13   |
| PROTHROMBIN TIME       | 23.43 ± 10.45 N=16  | 13.32 ± 0.4791 N=13  |
| WHITE CELL COUNT       | 14.83 ± 1.102 N=15  | 18.88 ± 2.225 N=13   |

**Table 1 (supplementary) showing blood biochemistry analysed prior to BAL addition. Parameters did not differ between pigs in control- and Cell-BAL groups, except AST, \*p=0038.**

| Parameters | Description of Parameters          | Units                                  | Control-BAL         | Cell-BAL            |
|------------|------------------------------------|----------------------------------------|---------------------|---------------------|
| APsys      | Arterial systolic pressure         | mmHg                                   | 106.8 ± 17.16 N=15  | 114.3 ± 24.71 N=12  |
| APdia      | Arterial diastolic pressure        | mmHg                                   | 57.07 ± 12.14 N=15  | 63 ± 17.17 N=12     |
| APmean     | Mean Arterial pressure             | mmHg                                   | 76.47 ± 13.96 N=15  | 83.08 ± 18.49 N=12  |
| HR         | Heart Rate                         | bpm                                    | 143.8 ± 32.84 N=15  | 134.1 ± 35.42 N=12  |
| PCCO       | Pulse Contour Cardiac Output       | litres/min                             | 3.991 ± 0.9786 N=14 | 4.142 ± 1.401 N=12  |
| PCCI       | Pulse Contour Cardiac Index        | litres/min/m <sup>2</sup>              | 4.596 ± 1.041 N=14  | 4.767 ± 1.537 N=12  |
| SV         | Stroke Volume                      | mls                                    | 28.64 ± 9.572 N=14  | 32.42 ± 11.93 N=12  |
| SVI        | Stroke Volume Index                | Mls/m <sup>2</sup>                     | 32.64 ± 9.889 N=14  | 37.08 ± 12.83 N=12  |
| SVmin      | Stroke Volume minimum              | mls                                    | 25.14 ± 8.787 N=14  | 29.33 ± 11.25 N=12  |
| SVmax      | Stroke Volume maximum              | mls                                    | 30.07 ± 9.531 N=14  | 34.67 ± 12.45 N=12  |
| SVV%       | % Stroke Volume Variation          | %                                      | 17.86 ± 5.869 N=14  | 17.42 ± 8.826 N=12  |
| PPV%       | % Pulse Pressure Variation         | %                                      | 22.6 ± 7.595 N=15   | 21.83 ± 8.653 N=12  |
| CVP        | Central Venous Pressure            | mmHg                                   | 9.4 ± 1.242 N=15    | 9.5 ± 1.168 N=12    |
| SVR        | Systemic Vascular Resistance       | mmHg·min·mL <sup>-1</sup>              | 1807 ± 1410 N=15    | 1524 ± 444.8 N=12   |
| SVRI       | Systemic Vascular Resistance Index | dyn*s*cm <sup>-5</sup> *m <sup>2</sup> | 1551 ± 1188 N=15    | 1314 ± 383.1 N=12   |
| dPmx       | Left Ventricular Contractility     | mmHg/s                                 | 887.3 ± 367.2 N=15  | 899.2 ± 369.7 N=12  |
| TBlood     | Blood Temperature                  | degrees celsius                        | 38.93 ± 1.469 N=15  | 39.04 ± 0.7902 N=12 |

**Table 2 (supplementary) showing haemodynamic parameters analysed prior to BAL addition. Parameters did not differ between pigs in control- and Cell-BAL groups**

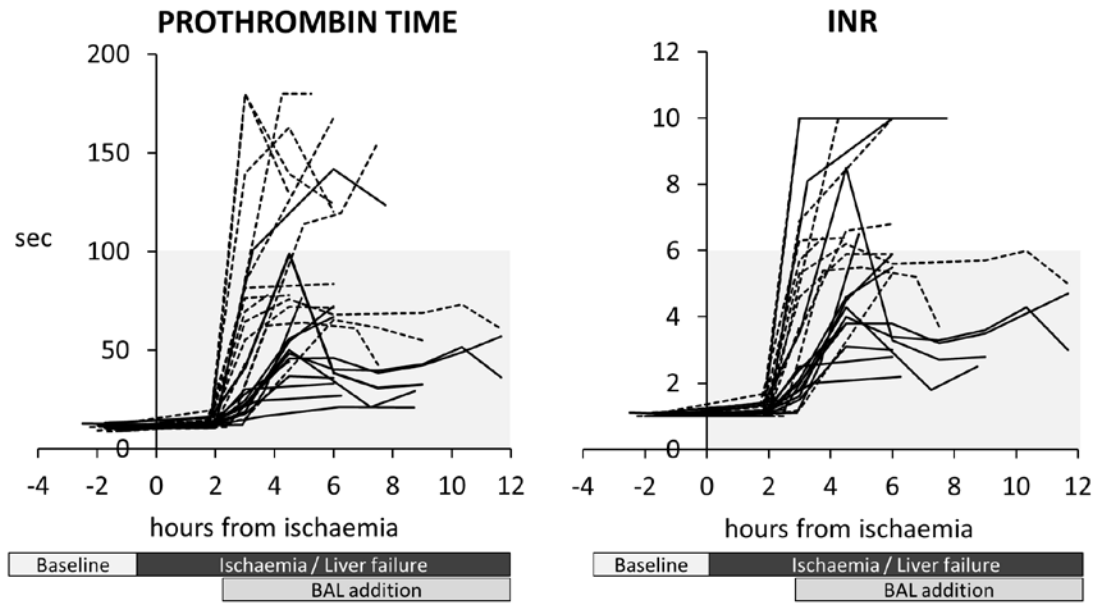

**Figure 3 (supplementary): Prothrombin time and International Normalised Ratio (INR) in individual pigs.** Control-BAL: dashed line, Cell-BAL: solid line, BAL on at  $2.80 \pm 0.5h$  from ischaemia. Prothrombin pig baseline =  $11.0 \pm 1$  sec, INR pig baseline =  $1.0 \pm 0$  ( $n=29$ ,  $\pm SD$ ). Shaded area represents values above which a patient would be listed for urgent transplant; Prothrombin time  $>100s$ , INR  $>6$ .

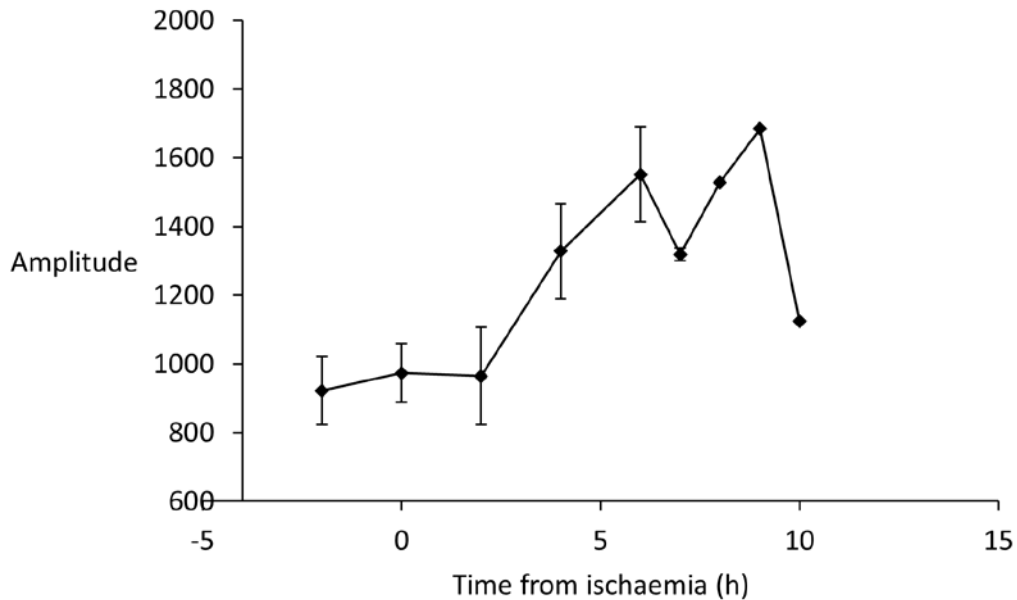

**Figure 4 (supplementary). Rotem measurement of coagulation: fibtem.** Fibtem is a surrogate marker of Fibrinogen's contribution to coagulation and assessed by MCF representing the amplitude of the clot. Increase in the MCF amplitude indicates fibrinogen being produced by the BAL, enhancing clot strength. Mean  $\pm$  SEM,  $n=10$ ; where error bars not present time points in individual pigs were not identical.

Kaplan-meier survival curve showing survival time (hours) of pigs treated with Cell BAL or Empty Bead BAL

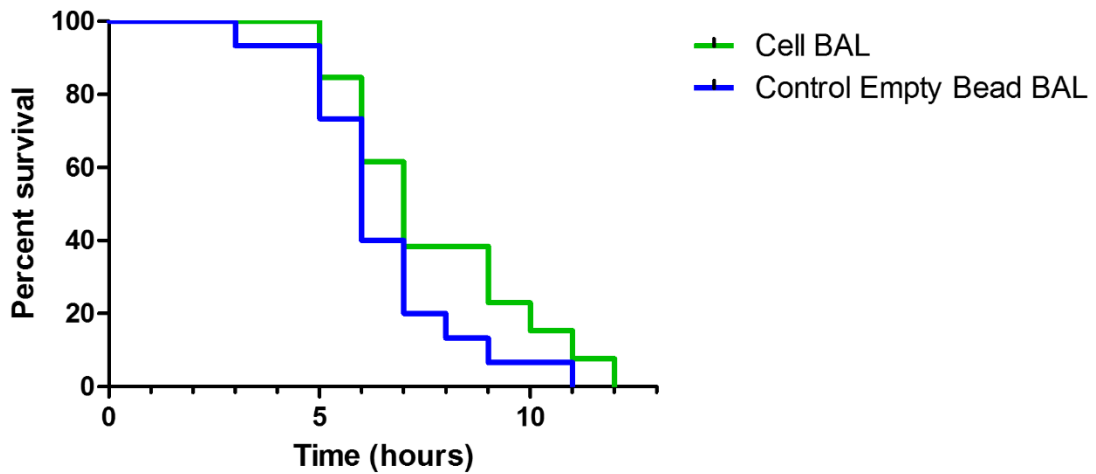

**Figure 5 (supplementary).** Kaplan Meier survival curve: There was no significant difference in survival, although as alluded to in the manuscript there was a small increase in survival time observed. Time is shown as hours from ischaemia to death for all the animals in control treated (blue) and cell-treated (green) groups. This was expected in a permanent injury non survival model.
